# Supplementary material for: Newly Designed Mesoporous Silica and Organosilica Nanostructures Based on Pentablock Copolymer Templates in Weakly Acidic Media
Source: MDPI journal article supplement (doi:10.3390/nano11102522), 2021-09-27
Supplement: s1 [file s1]

## *Supporting Information*

# **Newly Designed Mesoporous Silica and Organosilica Nanostructures Based on Pentablock Copolymer Templates in Weakly Acidic Media**

Nabanita Pal <sup>1</sup>, Young Sunwoo <sup>2</sup>, Jae-Seo Park <sup>2</sup>, Taeyeon Kim <sup>2</sup> and Eun-Bum Cho <sup>2,\*</sup>

<sup>1</sup> Department of Physics and Chemistry, Mahatma Gandhi Institute of Technology, Gandipet, Hyderabad 500075, India; nabanitapal\_chem@mgit.ac.in

<sup>2</sup> Department of Fine Chemistry, Seoul National University of Science and Technology, Seoul 01811, Korea; youngsw02@gmail.com (Y.S.); dedswe2@gmail.com (J.-S.P.); ktyeon91@gmail.com (T.K.)

\* Correspondence: echo@seoultech.ac.kr

|                  |                                                                                                                                                                                                        |
|------------------|--------------------------------------------------------------------------------------------------------------------------------------------------------------------------------------------------------|
| <b>Figure S1</b> | SEM images of mesoporous silica samples: PMSB-2 (a-1, a-2), PMSB-3 (b-1, b-2), PMSB-4 (c-1, c-2).                                                                                                      |
| <b>Figure S2</b> | SEM images of mesoporous organosilica samples: PMOA-1 (a-1, a-2), PMOA-2 (b-1, b-2), PMOA-3 (c-1, c-2), PMOA-4 (d-1, d-2), PMOB-1 (e-1, e-2), PMOB-2 (f-1, f-2), PMOB-3 (g-1, g-2), PMOB-4 (h-1, h-2). |
| <b>Figure S3</b> | SEM images of mesoporous organosilica samples: PMOBH-1 (a-1, a-2), PMOBH-2 (b-1, b-2), PMOBH-3 (c-1, c-2), PMOBH-4 (d-1, d-2).                                                                         |

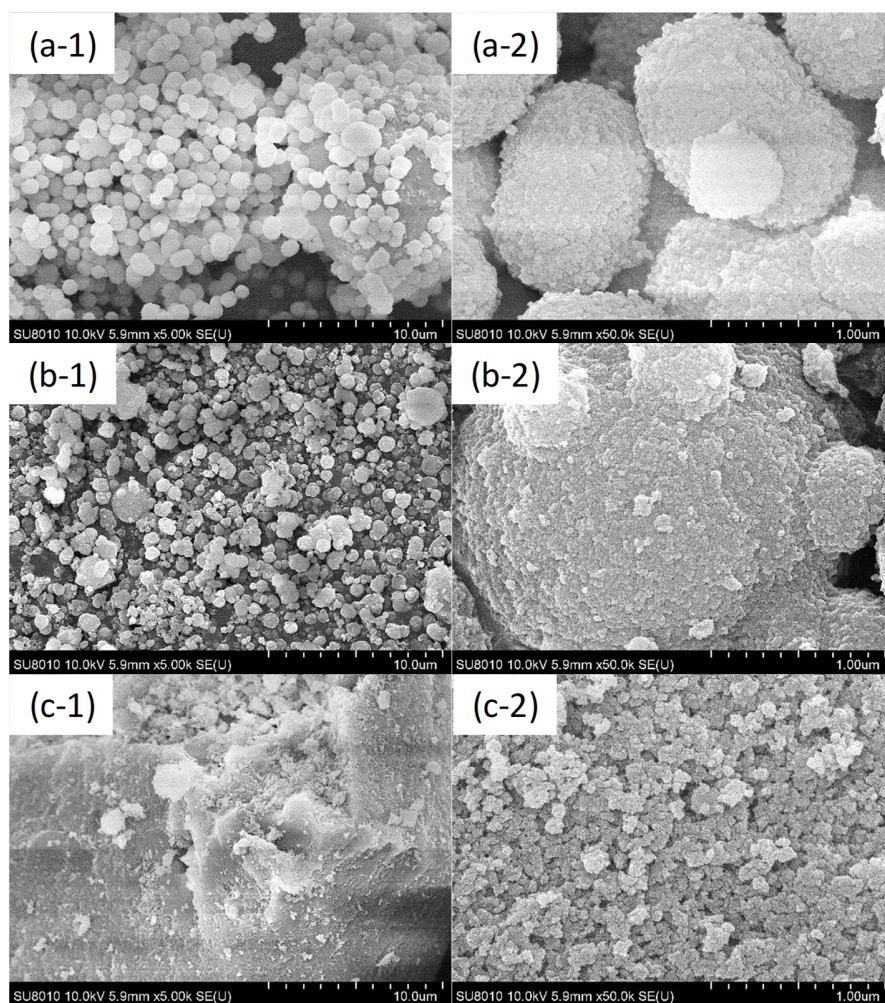

**Figure S1.** SEM images of mesoporous silica samples: PMSB-2 (**a-1**, **a-2**), PMSB-3 (**b-1**, **b-2**), PMSB-4 (**c-1**, **c-2**).

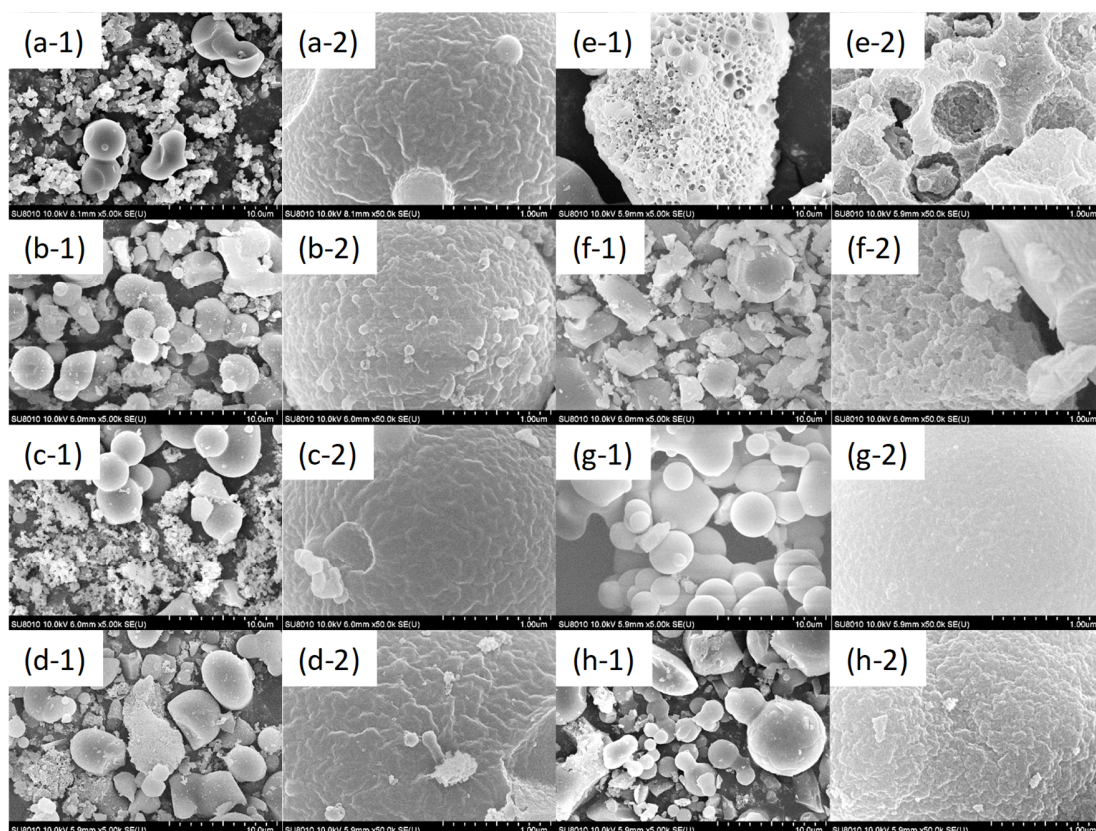

**Figure S2.** SEM images of mesoporous organosilica samples: PMOA-1 (**a-1**, **a-2**), PMOA-2 (**b-1**, **b-2**), PMOA-3 (**c-1**, **c-2**), PMOA-4 (**d-1**, **d-2**), PMOB-1 (**e-1**, **e-2**), PMOB-2 (**f-1**, **f-2**), PMOB-3 (**g-1**, **g-2**), PMOB-4 (**h-1**, **h-2**).

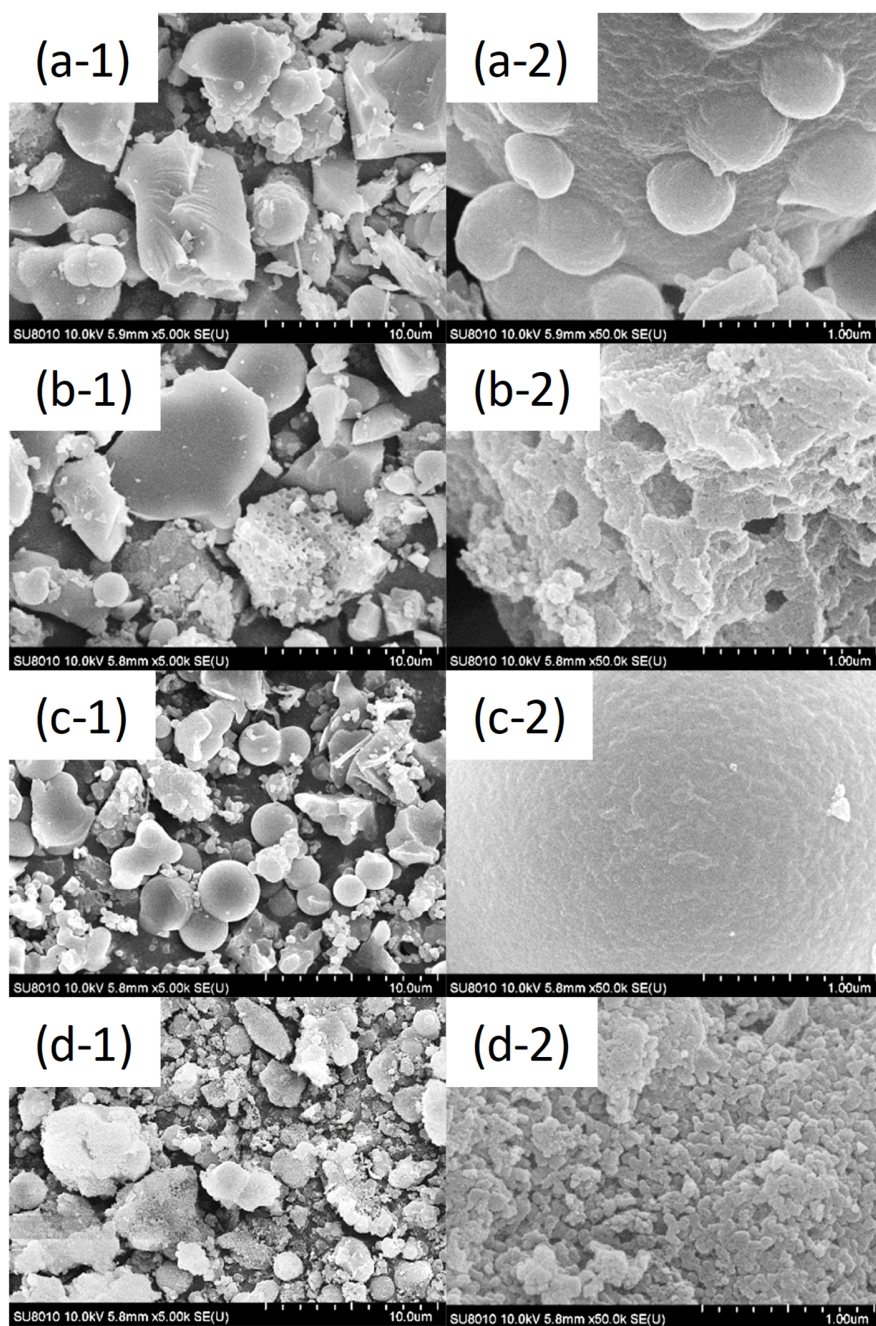

**Figure S3.** SEM images of mesoporous organosilica samples: PMOBH-1 (a-1, a-2), PMOBH-2 (b-1, b-2), PMOBH-3 (c-1, c-2), PMOBH-4 (d-1, d-2).
